# Supplementary material
Source: Research Square preprint supplement (doi:10.21203/rs.3.rs-9200621/v1)
Supplement: Supplementary file 1 [file e7d057dca5e3d64f9d74e9fd.xlsx]

## Sheet: R3 VS G3
Compound_ID	Name	Formula	Molecular Weight	RT [min]	m/z	mzCloud_Results	mzVault_Results	MassList_Results	Class_I	Class_II	Class_III	Class_IV	all_R3_1	all_R3_2	all_R3_3	all_R3_4	all_R3_5	all_R3_6	all_G3_1	all_G3_2	all_G3_3	all_G3_4	all_G3_5	all_G3_6	FC	log2FC	Pvalue	ROC	VIP
Com_941_neg	Glycitein	C16 H12 O5	284.069	6.706	283.061	Full match	Full match	Full match	Phenylpropanoids and polyketides	Isoflavonoids	Isoflav-2-enes	Isoflavones	1.01132e+08	8.96562e+07	7.55471e+07	2.68309e+08	3.92082e+07	9.81408e+07	451180	416286	525351	554176	581981	496111	222.14	7.79533	2.56403e-06	1	5.28544
Com_716_pos	Formononetin	C16 H12 O4	268.074	6.41	269.081	Full match	Full match	Full match	Phenylpropanoids and polyketides	Isoflavonoids	O-methylated isoflavonoids	4'-O-methylisoflavones	3.80622e+08	3.8529e+08	2.52603e+08	8.84786e+08	1.38835e+08	3.21577e+08	2.05569e+06	3.19122e+06	2.26953e+06	1.71905e+06	2.02456e+06	2.18144e+06	175.852	7.45822	1.01022e-06	1	5.42746
Com_2267_pos	Biochanin A	C16 H12 O5	284.068	6.716	285.076	Full match	Full match	Full match	Phenylpropanoids and polyketides	Isoflavonoids	O-methylated isoflavonoids	4'-O-methylisoflavones	1.15146e+08	1.14364e+08	7.61248e+07	2.60974e+08	3.91772e+07	9.70193e+07	2.07049e+06	2.03324e+06	2.50288e+06	2.4262e+06	1.91313e+06	1.71249e+06	55.5207	5.79495	1.10492e-05	1	4.89626
Com_3078_neg	Phenothiazine	C12 H9 N S	199.048	5.539	198.041	Invalid mass	No results	No results	Organoheterocyclic compounds	Benzothiazines	Phenothiazines	Phenothiazines	4.59029e+07	1.27502e+07	1.37538e+06	2.19757e+06	500101	6.44883e+07	655840	827140	586685	502814	717451	744992	31.5284	4.97858	0.0397416	0.833333	4.39562
Com_3812_pos	7-hydroxy-3-(4-methoxyphenyl)-4H-chromen-4-one	C16 H12 O4	290.055	6.481	291.063	Invalid mass	No results	No results					1.14494e+08	8.52306e+07	5.97765e+07	1.42807e+08	3.48476e+07	6.59786e+07	2.94409e+06	2.55195e+06	3.10039e+06	2.44661e+06	3.13965e+06	3.34201e+06	28.71	4.84348	8.34824e-06	1	4.57593
Com_3198_pos	1,4-dihydroxyheptadec-16-en-2-yl acetate	C19 H36 O4	310.251	7.904	311.258	Invalid mass	No results	No results					2.34714e+07	1.42733e+07	9.68515e+06	1.48915e+07	1.47853e+07	1.65084e+07	1.3163e+06	629189	707265	700567	1.11291e+06	744809	17.9647	4.1671	9.33283e-09	1	3.54609
Com_6355_pos	1,7-bis(4-hydroxyphenyl)-5-methoxyheptan-3-one	C20 H24 O4	350.155	7.921	351.162	Invalid mass	No results	No results					2.74658e+07	1.91383e+07	1.59383e+07	1.878e+07	1.99143e+07	1.91438e+07	842783	1.61039e+06	1.91803e+06	833885	1.16793e+06	952496	16.4331	4.03853	2.34303e-07	1	4.03925
Com_17888_pos	Wogonin	C16 H12 O5	284.068	5.944	285.076	No results	No results	Full match	Phenylpropanoids and polyketides	Flavonoids	O-methylated flavonoids	8-O-methylated flavonoids	7.67859e+06	7.92478e+06	3.4726e+06	1.04697e+07	2.70878e+06	5.78469e+06	607918	652724	626305	563743	579003	589503	10.5104	3.39374	0.000120413	1	5.92722
Com_1479_pos	4-oxo-4-(5,6,7,8-tetrahydronaphthalen-1-ylamino)but-2-enoic acid	C14 H15 N O3	227.091	1.365	228.098	Invalid mass	No results	No match					4.93785e+07	4.36804e+07	2.07685e+07	1.72971e+07	1.35601e+07	3.04457e+07	3.4313e+06	2.71264e+06	3.5141e+06	5.0372e+06	2.85113e+06	3.07786e+06	8.49148	3.08602	5.56207e-05	1	2.87914
Com_4827_pos	2'-Deoxyadenosine	C10 H13 N5 O3	251.102	3.448	252.109	Full match	Full match	Full match	Nucleosides, nucleotides, and analogues	Purine nucleosides	Purine 2'-deoxyribonucleosides	Purine 2'-deoxyribonucleosides	8.33909e+07	2.49111e+07	2.7442e+07	1.81573e+07	1.37327e+07	4.5613e+07	2.91715e+06	3.58253e+06	2.95633e+06	7.64984e+06	5.15907e+06	3.72373e+06	8.20539	3.03657	0.000202761	1	4.5315
Com_3298_pos	Anacardic Acid	C22 H36 O3	348.266	7.987	349.274	No results	No results	Full match	Benzenoids	Benzene and substituted derivatives	Benzoic acids and derivatives	Salicylic acids	1.41806e+07	2.04863e+07	9.70708e+06	6.63882e+06	4.74813e+06	7.12968e+06	5.55972e+07	5.5981e+07	3.0378e+07	2.0471e+07	6.38476e+07	1.03086e+08	0.190947	-2.38875	0.000438161	0.972222	2.40419
Com_13762_pos	Cortisone	C21 H28 O5	742.379	8.701	743.386	Invalid mass	No results	No results	Lipids and lipid-like molecules	Steroids and steroid derivatives	Hydroxysteroids	21-hydroxysteroids	2.14923e+06	2.17814e+06	1.13635e+06	2.4358e+06	911353	1.96181e+06	4.09975e+06	1.05958e+07	1.20343e+06	6.80528e+06	1.03016e+07	1.15577e+07	0.241737	-2.04849	0.0149715	0.888889	3.02108
Com_13772_pos	LPE 17:1	C22 H44 N O7 P	465.285	9.254	488.274	No results	Full match	No results	Lipids and lipid-like molecules	Glycerophospholipids	Glycerophosphoethanolamines	1-acyl-sn-glycero-3-phosphoethanolamines	286987	315118	1.34403e+06	1.45495e+06	5.68361e+06	437528	4.56268e+06	1.13296e+06	1.79171e+06	2.43794e+07	2.30416e+06	4.99081e+06	0.243151	-2.04008	0.0493197	0.805556	2.55741
Com_4560_pos	5'-S-Methyl-5'-thioadenosine	C11 H15 N5 O3 S	297.09	5.173	298.097	Full match	Full match	Full match	Nucleosides, nucleotides, and analogues	5'-deoxyribonucleosides	5'-deoxy-5'-thionucleosides	5'-deoxy-5'-thionucleosides	5.1371e+06	5.11194e+06	7.39072e+06	5.01593e+06	7.00379e+06	3.10057e+06	2.0983e+07	1.6114e+07	1.41423e+07	2.4156e+07	2.58364e+07	2.35304e+07	0.26258	-1.92917	1.09e-05	1	2.50266
Com_6367_pos	Methyl syringate	C10 H12 O5	212.068	1.238	213.075	No results	No results	Full match	Benzenoids	Benzene and substituted derivatives	Benzoic acids and derivatives	Gallic acid and derivatives	3.08864e+06	3.41593e+06	3.2867e+06	2.84285e+06	2.39982e+06	4.60916e+06	1.14194e+07	8.51539e+06	9.35384e+06	2.25054e+07	1.41574e+07	7.0152e+06	0.269206	-1.89322	0.000234712	1	2.94008
Com_6629_pos	S-Adenosylhomocysteine	C14 H20 N6 O5 S	384.121	2.276	385.129	Full match	Full match	Full match	Nucleosides, nucleotides, and analogues	5'-deoxyribonucleosides	5'-deoxy-5'-thionucleosides	5'-deoxy-5'-thionucleosides	1.33943e+07	2.84723e+07	2.52594e+06	1.29346e+06	1.27638e+06	7.5163e+06	2.23745e+07	3.77859e+07	3.33182e+07	1.65642e+07	2.55622e+07	6.12594e+07	0.276732	-1.85344	0.0157203	0.916667	3.85774
Com_551_pos	Swainsonine	C8 H15 N O3	173.105	1.384	174.113	No results	No results	Full match	Organoheterocyclic compounds	Indolizidines	Not available	Indolizidines	8.01958e+07	8.20938e+07	8.24763e+07	7.87266e+07	7.32783e+07	7.49064e+06	2.07252e+08	1.98431e+08	1.92542e+08	4.27314e+08	2.44586e+08	1.83145e+08	0.278174	-1.84594	0.0121506	1	2.54577
Com_8369_pos	Lithocholic acid	C24 H40 O3	393.324	9.809	416.314	Invalid mass	No results	No results	Lipids and lipid-like molecules	Steroids and steroid derivatives	Bile acids, alcohols and derivatives	Monohydroxy bile acids, alcohols and derivatives	405578	345096	743712	566348	752130	1.29843e+06	4.02141e+06	554476	2.05489e+06	3.75005e+06	2.73722e+06	1.12572e+06	0.288638	-1.79267	0.0143842	0.861111	1.60521
Com_2204_pos	4-D-Hydroxysphinganine	C18 H39 N O3	317.293	7.749	318.3	No results	No results	Full match	Organic nitrogen compounds	Organonitrogen compounds	Amines	1,3-aminoalcohols	2.19434e+06	2.38687e+06	6.06574e+06	1.02741e+07	1.31292e+07	1.18127e+07	2.59504e+07	3.75149e+06	3.01447e+07	3.55641e+07	4.56415e+07	1.37243e+07	0.296317	-1.75478	0.037592	0.888889	2.04266
Com_3596_pos	Icariin	C33 H40 O15	676.238	6.207	677.246	No results	No results	Full match	Phenylpropanoids and polyketides	Flavonoids	Flavonoid glycosides	Flavonoid-7-O-glycosides	6.15469e+06	4.95141e+06	1.92996e+07	3.509e+07	2.44297e+07	8.37104e+06	7.85832e+07	5.74067e+07	5.07278e+07	5.07757e+07	4.77878e+07	3.18316e+07	0.309973	-1.68978	0.00654532	0.972222	1.66369

## Sheet: R3 VS M3
Compound_ID	Name	Formula	Molecular Weight	RT [min]	m/z	mzCloud_Results	mzVault_Results	MassList_Results	Class_I	Class_II	Class_III	Class_IV	all_R3_1	all_R3_2	all_R3_3	all_R3_4	all_R3_5	all_R3_6	all_M3_1	all_M3_2	all_M3_3	all_M3_4	all_M3_5	all_M3_6	FC	log2FC	Pvalue	ROC	VIP
Com_716_pos	Formononetin	C16 H12 O4	268.074	6.41	269.081	Full match	Full match	Full match	Phenylpropanoids and polyketides	Isoflavonoids	O-methylated isoflavonoids	4'-O-methylisoflavones	3.80622e+08	3.8529e+08	2.52603e+08	8.84786e+08	1.38835e+08	3.21577e+08	2.04279e+06	1.91332e+06	1.93133e+06	2.38213e+06	2.20416e+06	2.37784e+06	183.924	7.52297	3.42901e-06	1	5.03803
Com_941_neg	Glycitein	C16 H12 O5	284.069	6.706	283.061	Full match	Full match	Full match	Phenylpropanoids and polyketides	Isoflavonoids	Isoflav-2-enes	Isoflavones	1.01132e+08	8.96562e+07	7.55471e+07	2.68309e+08	3.92082e+07	9.81408e+07	497660	693014	669144	533326	617524	651381	183.502	7.51965	2.93706e-06	1	4.70494
Com_2267_pos	Biochanin A	C16 H12 O5	284.068	6.716	285.076	Full match	Full match	Full match	Phenylpropanoids and polyketides	Isoflavonoids	O-methylated isoflavonoids	4'-O-methylisoflavones	1.15146e+08	1.14364e+08	7.61248e+07	2.60974e+08	3.91772e+07	9.70193e+07	3.24519e+06	1.87033e+06	2.71135e+06	1.5323e+06	4.08936e+06	2.49738e+06	44.0743	5.46187	1.44562e-06	1	4.29674
Com_3812_pos	7-hydroxy-3-(4-methoxyphenyl)-4H-chromen-4-one	C16 H12 O4	290.055	6.481	291.063	Invalid mass	No results	No results					1.14494e+08	8.52306e+07	5.97765e+07	1.42807e+08	3.48476e+07	6.59786e+07	2.98228e+06	2.52072e+06	2.87152e+06	3.37775e+06	3.08823e+06	3.15093e+06	27.9652	4.80556	1.13511e-05	1	4.18481
Com_17888_pos	Wogonin	C16 H12 O5	284.068	5.944	285.076	No results	No results	Full match	Phenylpropanoids and polyketides	Flavonoids	O-methylated flavonoids	8-O-methylated flavonoids	7.67859e+06	7.92478e+06	3.4726e+06	1.04697e+07	2.70878e+06	5.78469e+06	702052	593487	670575	543768	663572	763701	9.66157	3.27226	9.95889e-05	1	5.27703
Com_7772_pos	N8-Acetylspermidine	C9 H21 N3 O	187.169	1.299	188.176	No results	No results	Full match	Organic acids and derivatives	Carboximidic acids and derivatives	Carboximidic acids	Carboximidic acids	3.73742e+07	4.65963e+07	3.47713e+07	4.33355e+07	5.39746e+07	3.84361e+07	5.61288e+06	3.86032e+06	4.81688e+06	8.23034e+06	4.3019e+06	3.05297e+06	8.51834	3.09057	1.66967e-06	1	6.03212
Com_1500_neg	Vaccarin	C32 H38 O19	726.202	5.227	725.195	No results	No results	Full match	Phenylpropanoids and polyketides	Flavonoids	Flavonoid glycosides	Flavonoid O-glycosides	2.70052e+07	4.09001e+07	1.03882e+07	8.84542e+06	2.75553e+06	7.32468e+07	1.02279e+07	2.36379e+06	1.43145e+06	593847	5.17627e+06	5.30021e+06	6.50135	2.70074	0.0219936	0.888889	1.82632
Com_9197_pos	N-Acetyl-L-histidine	C8 H11 N3 O3	197.08	1.361	198.088	No results	No results	Full match	Organic acids and derivatives	Carboxylic acids and derivatives	Amino acids, peptides, and analogues	Histidine and derivatives	1.36246e+07	1.34064e+07	6.70706e+06	6.26112e+06	7.59746e+06	1.10997e+07	1.53747e+06	1.63733e+06	2.39859e+06	1.4576e+06	1.45999e+06	1.2949e+06	5.99806	2.5845	4.61377e-06	1	3.60781
Com_2922_pos	Cytidine	C9 H13 N3 O5	243.086	1.687	244.093	Full match	Full match	Full match	Nucleosides, nucleotides, and analogues	Pyrimidine nucleosides	Not available	Pyrimidine nucleosides	1.80709e+08	9.68934e+07	3.11829e+07	3.16022e+07	1.48725e+07	6.60386e+07	9.797e+06	6.88212e+06	7.84073e+06	3.00369e+07	9.59684e+06	1.15001e+07	5.56878	2.47736	0.00703251	0.972222	2.9244
Com_245_pos	INK	C16 H31 N5 O5	188.116	4.66	189.124	Invalid mass	No match	No match					2.13245e+08	1.09753e+08	2.83236e+07	5.20474e+07	1.34629e+07	1.17595e+08	1.38799e+07	1.25482e+07	1.03488e+07	3.30535e+07	1.42854e+07	1.22719e+07	5.54456	2.47107	0.0171082	0.888889	1.64424
Com_318_pos	Acetylcholine	C7 H15 N O2	145.11	1.366	146.118	Full match	No results	No results	Organic nitrogen compounds	Organonitrogen compounds	Quaternary ammonium salts	Acyl cholines	6.27518e+06	2.53982e+07	6.57885e+07	7.80178e+06	9.00975e+06	2.83785e+07	1.76324e+09	2.02513e+09	1.95777e+09	5.89876e+08	1.9905e+09	1.5415e+09	0.014456	-6.11219	8.52803e-06	1	6.59952
Com_328_neg	DL-4-Hydroxyphenyllactic acid	C9 H10 O4	182.058	5.214	181.051	Full match	Full match	Full match	Phenylpropanoids and polyketides	Phenylpropanoic acids	Not available	Phenylpropanoic acids	1.07e+07	1.20749e+07	1.43954e+07	7.02002e+06	8.16768e+06	1.08816e+07	5.76241e+08	9.27266e+08	4.87508e+08	2.30656e+08	5.47361e+08	6.49683e+08	0.0184981	-5.75648	9.5023e-08	1	4.56538
Com_587_neg	Indole-3-lactic acid	C11 H11 N O3	205.074	5.683	204.067	Full match	Full match	Full match	Organoheterocyclic compounds	Indoles and derivatives	Indolyl carboxylic acids and derivatives	Indolyl carboxylic acids and derivatives	2.36089e+06	3.03567e+06	4.57464e+06	3.15195e+06	4.26354e+06	3.48436e+06	5.86247e+07	8.32327e+07	1.06033e+08	2.83054e+07	7.58438e+07	7.02648e+07	0.0494218	-4.33871	1.00242e-06	1	3.23814
Com_93_neg	3-Phenyllactic acid	C9 H10 O3	166.063	5.747	165.056	Full match	Full match	Full match	Phenylpropanoids and polyketides	Phenylpropanoic acids	Not available	Phenylpropanoic acids	1.88387e+08	1.25572e+08	1.44191e+08	1.59767e+08	1.96579e+08	1.67505e+08	2.37677e+09	2.63419e+09	2.88728e+09	8.98961e+08	2.2101e+09	2.45161e+09	0.0729629	-3.77669	4.93092e-06	1	3.36851
Com_59_neg	3,4-Dihydroxyphenylpropionic acid	C9 H10 O4	182.058	5.361	181.051	Full match	Full match	Full match	Phenylpropanoids and polyketides	Phenylpropanoic acids	Not available	Phenylpropanoic acids	5.90059e+06	4.16215e+06	4.91651e+06	4.76482e+06	5.25106e+06	3.78047e+06	6.67424e+07	1.06061e+08	5.4652e+07	2.46146e+07	5.83512e+07	7.72708e+07	0.0742228	-3.75199	1.92298e-05	1	2.16033
Com_4634_pos	(+/-)5(6)-EET Ethanolamide	C22 H37 N O3	363.277	8.969	386.267	Full match	No results	No results	Organic nitrogen compounds	Organonitrogen compounds	Amines	N-acylethanolamines	1.77165e+06	2.4161e+06	2.94236e+06	2.44719e+06	1.98939e+06	1.72934e+06	1.53535e+07	8.28215e+06	2.23195e+07	1.00096e+07	1.49791e+07	1.54625e+07	0.153878	-2.70014	3.80011e-06	1	2.74977
Com_6140_neg	4-Methylphenol	C7 H8 O	108.058	5.213	107.05	Full match	No results	Full match	Benzenoids	Phenols	Cresols	Para cresols	1.50527e+06	1.56116e+06	2.13642e+06	1.99542e+06	1.9249e+06	1.38757e+06	1.02927e+07	1.49731e+07	8.42901e+06	5.14583e+06	8.84584e+06	1.06523e+07	0.180167	-2.47259	1.12111e-05	1	3.84212
Com_4662_neg	Mycophenolic acid	C17 H20 O6	320.124	5.746	319.116	Invalid mass	No results	No results	Organoheterocyclic compounds	Isocoumarans	Isobenzofuranones	Phthalides	2.0243e+06	1.47343e+06	4.85818e+06	5.8349e+06	9.0987e+06	2.6449e+06	1.76398e+07	4.21157e+07	3.5106e+07	1.76072e+07	9.86059e+06	1.52389e+07	0.18852	-2.40721	0.000807919	1	2.62279
Com_889_neg	Phenylacetaldehyde	C8 H8 O	120.058	5.75	119.05	Full match	No results	No results	Benzenoids	Benzene and substituted derivatives	Phenylacetaldehydes	Phenylacetaldehydes	6.73339e+07	5.95051e+07	2.90596e+07	4.52505e+07	5.71462e+07	3.03879e+07	2.50606e+08	3.15039e+08	2.99441e+08	1.42621e+08	2.21509e+08	2.91763e+08	0.189801	-2.39744	6.07311e-06	1	3.7214
Com_9908_pos	Nitrosonornicotine	C9 H11 N3 O	177.092	6.242	178.099	Invalid mass	No results	No results	Organoheterocyclic compounds	Pyridines and derivatives	Pyrrolidinylpyridines	Pyrrolidinylpyridines	390636	433305	4.17297e+06	377887	394048	815793	832014	535320	7.7416e+06	1.47923e+07	2.06764e+06	8.06295e+06	0.193485	-2.36971	0.0492433	0.888889	3.33154

## Sheet: R30 VS G30
Compound_ID	Name	Formula	Molecular Weight	RT [min]	m/z	mzCloud_Results	mzVault_Results	MassList_Results	Class_I	Class_II	Class_III	Class_IV	all_R30_1	all_R30_2	all_R30_3	all_R30_4	all_R30_5	all_R30_6	all_G30_1	all_G30_2	all_G30_3	all_G30_4	all_G30_5	all_G30_6	FC	log2FC	Pvalue	ROC	VIP
Com_941_neg	Glycitein	C16 H12 O5	284.069	6.706	283.061	Full match	Full match	Full match	Phenylpropanoids and polyketides	Isoflavonoids	Isoflav-2-enes	Isoflavones	8.98804e+07	7.08464e+07	6.88262e+07	7.71606e+07	5.16311e+07	9.54792e+07	483524	505274	490581	292255	570513	445274	162.811	7.34706	3.02835e-12	1	3.28886
Com_716_pos	Formononetin	C16 H12 O4	268.074	6.41	269.081	Full match	Full match	Full match	Phenylpropanoids and polyketides	Isoflavonoids	O-methylated isoflavonoids	4'-O-methylisoflavones	2.27739e+08	2.11478e+08	1.66457e+08	2.29548e+08	1.46283e+08	2.46418e+08	3.48365e+06	4.02187e+06	2.63613e+06	4.21694e+06	978315	3.64332e+06	64.6948	6.01558	1.1716e-06	1	2.94005
Com_2267_pos	Biochanin A	C16 H12 O5	284.068	6.716	285.076	Full match	Full match	Full match	Phenylpropanoids and polyketides	Isoflavonoids	O-methylated isoflavonoids	4'-O-methylisoflavones	8.62826e+07	6.49547e+07	5.50301e+07	8.12314e+07	4.50144e+07	9.90704e+07	1.10225e+06	1.65576e+06	1.10306e+06	765311	1.2328e+06	1.41442e+06	59.3356	5.89082	2.95819e-10	1	3.30885
Com_3812_pos	7-hydroxy-3-(4-methoxyphenyl)-4H-chromen-4-one	C16 H12 O4	290.055	6.481	291.063	Invalid mass	No results	No results					6.24015e+07	9.03854e+07	4.12909e+07	7.50361e+07	3.96728e+07	6.29071e+07	1.25055e+06	1.33156e+06	1.30232e+06	1.20799e+06	1.56786e+06	1.18046e+06	47.4054	5.56698	1.67487e-07	1	3.43883
Com_342_neg	Guanosine	C10 H13 N5 O5	283.092	3.331	282.085	Full match	Full match	Full match	Nucleosides, nucleotides, and analogues	Purine nucleosides	Not available	Purine nucleosides	3.98677e+07	3.47736e+07	1.11732e+08	4.45852e+07	4.26598e+07	3.34148e+07	2.67705e+06	1.24459e+06	1.41305e+06	1.45426e+06	2.67365e+06	1.87569e+06	27.0793	4.75912	1.28926e-07	1	1.89456
Com_7187_pos	NMH	C15 H24 N6 O5 S	422.136	5.499	423.143	Invalid mass	No results	No results					2.41235e+07	3.66124e+07	2.64997e+07	2.37759e+07	1.87721e+07	1.83595e+07	940901	865434	975151	1.09136e+06	916359	948892	25.8175	4.69028	1.09543e-07	1	3.71621
Com_1612_pos	2'-O-Methyladenosine	C11 H15 N5 O4	281.113	4.751	282.12	Full match	Full match	Full match	Nucleosides, nucleotides, and analogues	Purine nucleosides	Not available	Purine nucleosides	1.46505e+08	1.69688e+08	1.61325e+08	1.64194e+08	1.71139e+08	1.61183e+08	8.34393e+06	3.38463e+06	4.76056e+06	2.23223e+06	1.48898e+07	4.97702e+06	25.2418	4.65774	5.33999e-05	1	2.06084
Com_569_pos	Neopterin	C9 H11 N5 O4	253.081	2.415	254.088	Full match	No results	No results	Organoheterocyclic compounds	Pteridines and derivatives	Pterins and derivatives	Biopterins and derivatives	6.76956e+07	4.8649e+07	3.30279e+07	6.86504e+07	5.90769e+07	8.48616e+07	3.2906e+06	2.777e+06	3.01356e+06	3.54119e+06	3.00571e+06	2.94465e+06	19.4889	4.28458	1.30678e-06	1	2.15546
Com_5789_pos	6,7-dihydro-5H-dibenzo[d,f][1,3]diazepin-6-one	C13 H10 N2 O	210.079	6.664	211.087	Full match	No results	No results					7.5269e+06	4.97379e+06	7.3069e+06	1.21001e+07	1.6562e+07	6.79693e+06	527784	475235	623361	320229	598364	412773	18.6854	4.22384	6.629e-07	1	2.83614
Com_2326_pos	3-hydroxyquinuclidine-3-carbonitrile hydrochloride	C8 H12 N2 O	152.095	4.93	153.102	Full match	No results	No results					2.80369e+07	1.71847e+07	2.42825e+07	4.85595e+07	5.3507e+07	3.58776e+07	1.95225e+06	2.03095e+06	1.98996e+06	2.33633e+06	1.89601e+06	2.07885e+06	16.8872	4.07786	1.35042e-05	1	2.69203
Com_1007_pos	(2R,3S,4S,5R,6R)-2-(hydroxymethyl)-6-(propan-2-yloxy)oxane-3,4,5-triol	C9 H18 O6	244.093	5.143	245.1	Invalid mass	No results	No results					4.13468e+06	3.76587e+06	5.31226e+06	4.01668e+06	2.26495e+06	4.12852e+06	7.63205e+07	9.55481e+07	6.67147e+07	7.71204e+07	1.03856e+08	6.94317e+07	0.0483096	-4.37155	8.48903e-09	1	1.86178
Com_280_pos	Methylhippuric acid	C10 H11 N O3	193.074	5.256	211.108	Full match	No results	Full match	Organic acids and derivatives	Carboxylic acids and derivatives	Amino acids, peptides, and analogues	N-acyl-alpha amino acids and derivatives	1.75603e+06	1.79792e+06	1.62148e+06	1.74468e+06	2.56226e+06	2.43872e+06	1.98514e+07	2.45065e+07	6.22967e+07	6.66605e+07	5.74781e+06	5.81589e+07	0.0502529	-4.31465	0.000739252	1	1.73683
Com_1315_neg	3-methyl-5-oxo-5-(4-toluidino)pentanoic acid	C13 H17 N O3	235.121	6.078	234.114	Full match	No results	No results					454509	526955	446711	455658	470932	455951	3.92167e+06	6.21314e+06	8.58218e+06	1.80701e+07	2.72777e+06	1.21574e+07	0.0543951	-4.20038	0.00021143	1	1.5568
Com_3298_pos	Anacardic Acid	C22 H36 O3	348.266	7.987	349.274	No results	No results	Full match	Benzenoids	Benzene and substituted derivatives	Benzoic acids and derivatives	Salicylic acids	2.7502e+06	3.04953e+06	4.50993e+06	3.3384e+06	2.57622e+06	3.02973e+06	6.17894e+07	8.27648e+07	6.41479e+07	8.8774e+06	6.27162e+07	6.04763e+07	0.0565012	-4.14558	0.000337256	1	2.47226
Com_3417_neg	3,5-Dihydroxyphenylglycine	C8 H9 N O4	183.053	6.078	182.046	Full match	No results	Full match	Organic acids and derivatives	Carboxylic acids and derivatives	Amino acids, peptides, and analogues	Alpha amino acids	476343	552270	3.65933e+06	1.56249e+06	493555	477855	2.54867e+07	1.00089e+07	1.35106e+07	4.93082e+07	1.12012e+06	2.03181e+07	0.0603064	-4.05155	0.00238111	0.944444	2.55988
Com_8369_pos	Lithocholic acid	C24 H40 O3	393.324	9.809	416.314	Invalid mass	No results	No results	Lipids and lipid-like molecules	Steroids and steroid derivatives	Bile acids, alcohols and derivatives	Monohydroxy bile acids, alcohols and derivatives	248733	159778	209686	256539	242272	276454	3.77847e+06	1.51045e+06	3.16722e+06	4.96804e+06	4.84608e+06	4.10674e+06	0.0622721	-4.00527	2.73951e-06	1	2.48528
Com_8315_pos	1-Naphthyl acetate	C12 H10 O2	186.068	1.187	187.076	No results	No results	Full match					2.49503e+06	2.39131e+06	1.19244e+06	1.35615e+06	1.44131e+06	2.01685e+06	2.28534e+07	2.66177e+07	1.83927e+07	3.77544e+07	1.58542e+07	2.31973e+07	0.0752962	-3.73128	4.74959e-08	1	2.75925
Com_5639_pos	3-(2-morpholinophenyl)-2-(phenylsulfonyl)acrylonitrile	C19 H18 N2 O3 S	354.104	6.897	355.111	Full match	No results	No results					682566	586046	654597	681495	686081	636294	9.99432e+06	1.02457e+07	5.66299e+06	6.50167e+06	7.54244e+06	1.07135e+07	0.0775174	-3.68934	1.19512e-06	1	2.68029
Com_210_pos	6-cyclohex-3-enyl-5-nitropiperidin-2-one	C11 H16 N2 O3	224.116	5.376	225.124	Full match	No results	No results					2.86151e+06	4.01392e+06	3.00259e+06	3.18971e+06	3.89049e+06	4.53879e+06	1.71836e+07	2.92572e+07	5.86851e+07	8.36797e+07	7.58965e+06	6.70653e+07	0.0815948	-3.61538	0.00169517	1	1.33076
Com_4923_pos	FMH	C20 H27 N5 O4 S	433.182	4.469	434.189	Invalid mass	No results	No results					334943	348602	308623	340374	348014	374224	965548	2.3017e+06	3.5838e+06	1.11264e+07	340474	5.57602e+06	0.0859957	-3.53959	0.013044	0.916667	1.67986

## Sheet: R30 VS M30
Compound_ID	Name	Formula	Molecular Weight	RT [min]	m/z	mzCloud_Results	mzVault_Results	MassList_Results	Class_I	Class_II	Class_III	Class_IV	all_R30_1	all_R30_2	all_R30_3	all_R30_4	all_R30_5	all_R30_6	all_M30_1	all_M30_2	all_M30_3	all_M30_4	all_M30_5	all_M30_6	FC	log2FC	Pvalue	ROC	VIP
Com_720_pos	N6-Succinyl Adenosine	C14 H17 N5 O8	383.108	5.014	384.115	No results	No results	Full match	Nucleosides, nucleotides, and analogues	Purine nucleosides	Not available	Purine nucleosides	4.02635e+08	5.05999e+08	5.14313e+08	5.12443e+08	4.16274e+08	3.99809e+08	1.18161e+06	1.00484e+06	1.12615e+06	1.13401e+06	946472	1.04334e+06	427.484	8.73973	1.55243e-14	1	2.56757
Com_1612_pos	2'-O-Methyladenosine	C11 H15 N5 O4	281.113	4.751	282.12	Full match	Full match	Full match	Nucleosides, nucleotides, and analogues	Purine nucleosides	Not available	Purine nucleosides	1.46505e+08	1.69688e+08	1.61325e+08	1.64194e+08	1.71139e+08	1.61183e+08	626721	505778	597700	671325	533294	487003	284.654	8.15307	4.53545e-12	1	2.37744
Com_204_neg	Camelliaside A	C33 H40 O20	756.213	5.395	755.205	No results	No results	Full match	Phenylpropanoids and polyketides	Flavonoids	Flavonoid glycosides	Flavonoid-3-O-glycosides	2.74095e+08	2.28007e+08	2.95929e+08	2.62219e+08	2.65834e+08	2.17553e+08	2.53616e+06	1.35843e+06	1.15818e+06	2.4752e+06	1.73024e+06	1.21425e+06	147.4	7.20359	3.76222e-08	1	2.24168
Com_941_neg	Glycitein	C16 H12 O5	284.069	6.706	283.061	Full match	Full match	Full match	Phenylpropanoids and polyketides	Isoflavonoids	Isoflav-2-enes	Isoflavones	8.98804e+07	7.08464e+07	6.88262e+07	7.71606e+07	5.16311e+07	9.54792e+07	552180	583000	494257	499183	538357	510851	142.809	7.15795	4.4896e-09	1	2.22714
Com_3336_pos	N-Acetylglucosamine	C8 H15 N O6	221.09	1.336	260.053	No results	No results	Full match	Organic oxygen compounds	Organooxygen compounds	Carbohydrates and carbohydrate conjugates	Acylaminosugars	5.5263e+07	5.57188e+07	4.60397e+07	4.985e+07	5.77017e+07	7.08683e+07	560874	366744	331652	385684	362816	399687	139.334	7.12241	5.08918e-13	1	2.82662
Com_472_neg	Trehalose 6-phosphate	C12 H23 O14 P	422.083	1.336	421.076	No results	No results	Full match	Lipids and lipid-like molecules	Saccharolipids	Not available	Saccharolipids	1.5636e+08	2.42912e+08	1.63236e+08	2.12543e+08	1.93756e+08	1.87637e+08	2.12221e+06	1.46565e+06	1.27428e+06	884527	3.00804e+06	950397	119.158	6.89674	2.53355e-07	1	2.11419
Com_716_pos	Formononetin	C16 H12 O4	268.074	6.41	269.081	Full match	Full match	Full match	Phenylpropanoids and polyketides	Isoflavonoids	O-methylated isoflavonoids	4'-O-methylisoflavones	2.27739e+08	2.11478e+08	1.66457e+08	2.29548e+08	1.46283e+08	2.46418e+08	2.42562e+06	2.56954e+06	1.91479e+06	1.28566e+06	1.56469e+06	2.5655e+06	99.6222	6.6384	1.35111e-10	1	2.22586
Com_527_pos	Vindoline	C25 H32 N2 O6	456.233	5.878	457.241	Invalid mass	No results	No results	Alkaloids and derivatives	Plumeran-type alkaloids	Not available	Plumeran-type alkaloids	1.3637e+08	9.73589e+07	1.26853e+08	1.69478e+08	1.37853e+08	1.40989e+08	2.13286e+06	1.24277e+06	1.23112e+06	1.47244e+06	1.25089e+06	1.16942e+06	95.1706	6.57244	8.17497e-12	1	1.96087
Com_1038_neg	3-O-p-coumaroyl shikimic acid O-hexoside	C22 H26 O12	482.143	5.593	481.136	No results	No results	Full match					4.07456e+07	4.29175e+07	4.45946e+07	4.73403e+07	4.36943e+07	4.7049e+07	545862	576829	585594	642345	491655	568988	78.0768	6.28682	1.61247e-14	1	2.40127
Com_50_neg	Fumaric acid	C4 H4 O4	116.011	2.122	115.004	Full match	Full match	Full match	Organic acids and derivatives	Carboxylic acids and derivatives	Dicarboxylic acids and derivatives	Dicarboxylic acids and derivatives	3.84523e+08	4.25778e+08	5.4176e+08	5.95414e+08	4.71177e+08	3.91785e+08	7.31404e+06	8.1738e+06	6.50595e+06	7.06486e+06	7.18687e+06	6.67508e+06	65.4799	6.03298	2.65949e-10	1	2.17386
Com_548_pos	2-(4-chlorophenoxy)-N-(2-oxo-3-azepanyl)nicotinamide	C18 H18 Cl N3 O3	359.101	5.589	360.108	Invalid mass	No results	No results					1.76876e+06	1.53952e+06	1.62473e+06	1.59003e+06	1.60195e+06	1.69504e+06	2.2754e+08	2.28616e+08	2.5801e+08	2.4684e+08	9.7836e+07	2.96056e+08	0.0072478	-7.10824	5.5014e-07	1	2.40585
Com_634_neg	Ferulic acid O-hexoside	C16 H20 O9	356.111	5.26	355.104	No results	No results	Full match	Phenylpropanoids and polyketides	Cinnamic acids and derivatives	Hydroxycinnamic acids and derivatives	Hydroxycinnamic acid glycosides	993624	1.21237e+06	1.05684e+06	1.03347e+06	948283	1.04076e+06	1.18626e+08	8.40738e+07	1.51638e+08	3.21162e+08	4.0908e+07	1.48097e+08	0.00727047	-7.10374	1.07671e-05	1	3.06391
Com_915_neg	Sinapyl Alcohol	C11 H14 O4	210.089	5.91	209.082	No results	No results	Full match	Benzenoids	Phenols	Methoxyphenols	Methoxyphenols	961123	631764	594438	658681	643481	800100	4.0348e+07	7.03626e+07	9.17867e+07	1.34046e+08	2.04302e+07	1.20127e+08	0.00899095	-6.79731	9.28364e-06	1	2.07714
Com_59_neg	3,4-Dihydroxyphenylpropionic acid	C9 H10 O4	182.058	5.361	181.051	Full match	Full match	Full match	Phenylpropanoids and polyketides	Phenylpropanoic acids	Not available	Phenylpropanoic acids	2.7555e+07	4.23172e+07	1.69481e+07	2.36665e+07	1.47493e+07	2.2218e+07	8.71104e+08	1.26702e+09	1.85082e+09	3.2882e+09	6.56492e+08	1.85736e+09	0.0150602	-6.05312	2.55428e-07	1	1.70786
Com_1315_neg	3-methyl-5-oxo-5-(4-toluidino)pentanoic acid	C13 H17 N O3	235.121	6.078	234.114	Full match	No results	No results					454509	526955	446711	455658	470932	455951	1.92625e+07	2.67046e+07	1.98652e+07	1.98053e+07	2.28695e+07	2.22679e+07	0.0214928	-5.54	1.7783e-11	1	1.53286
Com_5782_pos	Lactose	C12 H22 O11	342.116	2.266	343.124	No results	No results	Full match	Organic oxygen compounds	Organooxygen compounds	Carbohydrates and carbohydrate conjugates	O-glycosyl compounds	884074	720938	634185	662379	717220	640806	2.76054e+07	3.34984e+07	3.27035e+07	3.8521e+07	2.17229e+07	4.20301e+07	0.0217237	-5.52459	1.40433e-09	1	2.59128
Com_8369_pos	Lithocholic acid	C24 H40 O3	393.324	9.809	416.314	Invalid mass	No results	No results	Lipids and lipid-like molecules	Steroids and steroid derivatives	Bile acids, alcohols and derivatives	Monohydroxy bile acids, alcohols and derivatives	248733	159778	209686	256539	242272	276454	1.29726e+07	6.75328e+06	1.1915e+07	3.32851e+06	1.46814e+07	5.39102e+06	0.0253164	-5.30378	6.63797e-06	1	2.26728
Com_3064_pos	Irisflorentin	C20 H18 O8	386.1	5.389	404.134	No results	No results	Full match	Phenylpropanoids and polyketides	Isoflavonoids	O-methylated isoflavonoids	4'-O-methylisoflavones	1.08107e+06	683110	916895	671524	655495	816671	3.51178e+07	3.3261e+07	3.49175e+07	1.95192e+07	1.34388e+07	3.70381e+07	0.0278418	-5.1666	2.22937e-07	1	2.11819
Com_4513_pos	Protosappanin B	C16 H16 O6	304.095	5.648	305.102	No results	No results	Full match	Organic oxygen compounds	Organooxygen compounds	Ethers	Alkyl aryl ethers	1.01387e+06	1.1318e+06	903475	920098	898660	850183	2.98242e+07	2.39052e+07	2.72989e+07	7.18692e+07	1.20007e+07	3.09572e+07	0.0291955	-5.09811	1.89239e-05	1	2.69213
Com_2511_pos	5-[(2-hydroxybenzylidene)amino]-2-(2-methoxyethoxy)benzoic acid	C17 H17 N O5	315.111	6.021	316.118	Full match	No results	No results					649901	750899	3.42504e+06	663200	664096	688310	3.94258e+07	3.19894e+07	3.93344e+07	2.98832e+07	1.44121e+07	4.48863e+07	0.034219	-4.86906	2.53272e-06	1	1.86756

## Sheet: R60 VS G60
Compound_ID	Name	Formula	Molecular Weight	RT [min]	m/z	mzCloud_Results	mzVault_Results	MassList_Results	Class_I	Class_II	Class_III	Class_IV	all_R60_1	all_R60_2	all_R60_3	all_R60_4	all_R60_5	all_R60_6	all_G60_1	all_G60_2	all_G60_3	all_G60_4	all_G60_5	all_G60_6	FC	log2FC	Pvalue	ROC	VIP
Com_941_neg	Glycitein	C16 H12 O5	284.069	6.706	283.061	Full match	Full match	Full match	Phenylpropanoids and polyketides	Isoflavonoids	Isoflav-2-enes	Isoflavones	8.64182e+07	2.27264e+07	2.75903e+07	9.29778e+07	3.02968e+07	3.68867e+07	643125	427039	481796	520564	514934	683756	90.7602	6.50399	3.36335e-06	1	2.12515
Com_1612_pos	2'-O-Methyladenosine	C11 H15 N5 O4	281.113	4.751	282.12	Full match	Full match	Full match	Nucleosides, nucleotides, and analogues	Purine nucleosides	Not available	Purine nucleosides	5.73223e+07	2.732e+07	5.76891e+07	4.24407e+07	4.15269e+07	2.93488e+07	774004	581587	666657	554400	515686	586018	69.5007	6.11895	1.3408e-08	1	1.91284
Com_2326_pos	3-hydroxyquinuclidine-3-carbonitrile hydrochloride	C8 H12 N2 O	152.095	4.93	153.102	Full match	No results	No results					1.39855e+08	1.26626e+08	1.47419e+08	1.13733e+08	1.28123e+08	4.306e+07	2.77171e+06	3.18477e+06	3.57158e+06	2.25539e+06	3.36943e+06	2.65757e+06	39.2362	5.29411	1.10444e-06	1	2.66255
Com_2267_pos	Biochanin A	C16 H12 O5	284.068	6.716	285.076	Full match	Full match	Full match	Phenylpropanoids and polyketides	Isoflavonoids	O-methylated isoflavonoids	4'-O-methylisoflavones	8.79441e+07	2.27923e+07	3.02344e+07	8.70267e+07	3.24656e+07	3.58674e+07	1.58031e+06	833796	1.99627e+06	972147	1.66849e+06	1.44263e+06	34.8885	5.12468	1.26889e-06	1	2.11486
Com_716_pos	Formononetin	C16 H12 O4	268.074	6.41	269.081	Full match	Full match	Full match	Phenylpropanoids and polyketides	Isoflavonoids	O-methylated isoflavonoids	4'-O-methylisoflavones	2.43053e+08	9.75747e+07	9.5256e+07	2.64391e+08	1.22022e+08	1.20195e+08	5.30555e+06	5.32194e+06	5.68564e+06	4.87536e+06	3.6756e+06	4.17893e+06	32.4516	5.02022	1.44123e-06	1	1.77277
Com_7187_pos	NMH	C15 H24 N6 O5 S	422.136	5.499	423.143	Invalid mass	No results	No results					2.21534e+07	2.48272e+07	1.57255e+07	4.15068e+07	3.36678e+07	3.44824e+07	825648	857732	1.0547e+06	981790	795067	797874	32.4429	5.01983	4.33163e-07	1	2.98874
Com_3789_pos	Biopterin	C9 H11 N5 O3	237.086	5.17	238.094	Full match	No results	Full match	Organoheterocyclic compounds	Pteridines and derivatives	Pterins and derivatives	Biopterins and derivatives	8.72032e+07	5.6748e+07	6.5045e+07	4.92016e+07	6.78728e+07	5.39315e+07	1.83897e+06	2.53913e+06	2.2245e+06	1.93243e+06	2.03175e+06	1.85449e+06	30.5929	4.93512	2.70132e-10	1	2.60737
Com_3812_pos	7-hydroxy-3-(4-methoxyphenyl)-4H-chromen-4-one	C16 H12 O4	290.055	6.481	291.063	Invalid mass	No results	No results					4.87307e+07	1.57828e+07	2.26657e+07	8.27521e+07	2.08455e+07	3.43917e+07	1.38233e+06	1.19579e+06	1.24411e+06	1.22833e+06	1.36292e+06	1.35014e+06	29.0031	4.85813	4.67078e-05	1	2.17679
Com_6295_pos	Kanosamine	C6 H13 N O5	179.081	4.964	180.088	Invalid mass	No results	No results	Organic oxygen compounds	Organooxygen compounds	Carbohydrates and carbohydrate conjugates	Hexoses	4.12652e+07	4.05818e+07	4.24362e+07	4.1951e+07	3.50967e+07	3.50115e+07	1.3552e+06	1.63311e+06	1.47657e+06	1.53638e+06	1.45858e+06	1.48543e+06	26.4209	4.72361	1.05797e-13	1	2.41646
Com_7535_pos	2-(Dimethylamino)Guanosine	C12 H17 N5 O5	311.123	4.967	312.13	No results	No results	Full match					2.83995e+07	3.03678e+07	3.44967e+07	3.02702e+07	2.50047e+07	2.71484e+07	1.17605e+06	1.43736e+06	1.26706e+06	1.42705e+06	1.34447e+06	1.29762e+06	22.1002	4.46598	1.12913e-12	1	2.18839
Com_1315_neg	3-methyl-5-oxo-5-(4-toluidino)pentanoic acid	C13 H17 N O3	235.121	6.078	234.114	Full match	No results	No results					448242	438709	475511	482178	466715	456273	3.31149e+07	1.23032e+08	5.34825e+07	2.52489e+07	1.13092e+08	1.31582e+08	0.00577127	-7.4369	1.29457e-05	1	2.14564
Com_280_pos	Methylhippuric acid	C10 H11 N O3	193.074	5.256	211.108	Full match	No results	Full match	Organic acids and derivatives	Carboxylic acids and derivatives	Amino acids, peptides, and analogues	N-acyl-alpha amino acids and derivatives	4.03216e+06	3.89218e+06	4.6693e+06	3.22142e+06	3.41603e+06	3.39949e+06	7.12062e+07	4.37441e+08	2.50622e+08	6.18343e+07	3.16072e+08	5.34693e+08	0.0135361	-6.20704	0.000102578	1	1.93597
Com_1007_pos	(2R,3S,4S,5R,6R)-2-(hydroxymethyl)-6-(propan-2-yloxy)oxane-3,4,5-triol	C9 H18 O6	244.093	5.143	245.1	Invalid mass	No results	No results					2.33089e+06	3.12862e+06	6.61672e+06	4.30118e+06	3.56464e+06	6.01127e+06	1.48007e+08	2.35037e+08	1.88034e+08	1.77872e+08	2.42317e+08	2.30574e+08	0.0212412	-5.55699	7.11654e-08	1	1.79757
Com_427_neg	Higenamine	C16 H17 N O3	271.121	6.725	270.114	No results	No results	Full match	Organoheterocyclic compounds	Isoquinolines and derivatives	Benzylisoquinolines	Benzylisoquinolines	1.23e+06	663249	3.38447e+06	535419	4.03502e+06	1.79772e+07	2.3561e+08	1.14016e+08	5.76917e+07	5.71889e+08	3.23963e+07	5.05757e+07	0.0261965	-5.25448	0.00026914	1	1.93048
Com_5639_pos	3-(2-morpholinophenyl)-2-(phenylsulfonyl)acrylonitrile	C19 H18 N2 O3 S	354.104	6.897	355.111	Full match	No results	No results					654228	691906	625338	662581	631962	605439	9.35244e+06	2.29064e+07	2.03498e+07	1.29102e+07	3.69073e+07	2.66527e+07	0.029993	-5.05923	1.22153e-05	1	2.72694
Com_170_pos	Normorphine	C16 H17 N O3	271.121	6.738	272.128	Full match	No results	Full match	Alkaloids and derivatives	Morphinans	Not available	Morphinans	7.46036e+06	4.46291e+06	1.64661e+07	4.01972e+06	2.10467e+07	8.4964e+07	1.05919e+09	4.08497e+08	2.1436e+08	2.46439e+09	1.3055e+08	2.20443e+08	0.0307775	-5.02198	0.000299167	1	1.47268
Com_8369_pos	Lithocholic acid	C24 H40 O3	393.324	9.809	416.314	Invalid mass	No results	No results	Lipids and lipid-like molecules	Steroids and steroid derivatives	Bile acids, alcohols and derivatives	Monohydroxy bile acids, alcohols and derivatives	166271	130167	171963	269460	140934	242817	3.42561e+06	3.58734e+06	5.39828e+06	5.26677e+06	1.19708e+07	6.16461e+06	0.0313182	-4.99686	1.51589e-07	1	2.34394
Com_3983_neg	Palmitoyl ethanolamide	C18 H37 N O2	359.304	8.915	404.302	Invalid mass	No results	No results	Organic acids and derivatives	Carboximidic acids and derivatives	Carboximidic acids	Carboximidic acids	189640	218433	67669.2	119426	67761.2	147348	2.73982e+06	3.79624e+06	2.76935e+06	3.16849e+06	6.96548e+06	5.26664e+06	0.0327967	-4.9303	2.12349e-07	1	2.3488
Com_1720_neg	D-Saccharic acid	C6 H10 O8	210.035	5.823	209.028	Invalid mass	No results	No results	Organic oxygen compounds	Organooxygen compounds	Carbohydrates and carbohydrate conjugates	Glucuronic acid derivatives	1.17378e+06	1.79708e+06	1.30237e+06	613692	2.03069e+06	2.06955e+06	2.93072e+07	5.02621e+07	4.51175e+07	2.89604e+07	5.68582e+07	4.90769e+07	0.0346216	-4.85218	1.98199e-07	1	2.03621
Com_16979_pos	R-1 Methanandamide phosphate	C23 H40 N O5 P	463.24	9.367	464.247	Invalid mass	No results	No results	Organic acids and derivatives	Organic phosphoric acids and derivatives	Phosphate esters	Phosphoethanolamines	96751.3	85310.5	89543.1	87635.9	66418.3	114640	1.978e+06	2.1e+06	1.98249e+06	2.1161e+06	3.90552e+06	3.17366e+06	0.0354161	-4.81945	6.01676e-09	1	2.75382

## Sheet: R60 VS M60
Compound_ID	Name	Formula	Molecular Weight	RT [min]	m/z	mzCloud_Results	mzVault_Results	MassList_Results	Class_I	Class_II	Class_III	Class_IV	all_R60_1	all_R60_2	all_R60_3	all_R60_4	all_R60_5	all_R60_6	all_M60_1	all_M60_2	all_M60_3	all_M60_4	all_M60_5	all_M60_6	FC	log2FC	Pvalue	ROC	VIP
Com_472_neg	Trehalose 6-phosphate	C12 H23 O14 P	422.083	1.336	421.076	No results	No results	Full match	Lipids and lipid-like molecules	Saccharolipids	Not available	Saccharolipids	2.41696e+08	2.57085e+08	2.49701e+08	2.00894e+08	2.22735e+08	2.53829e+08	126070	401701	594421	205973	107695	586523	705.079	9.46164	2.87669e-06	1	2.57987
Com_720_pos	N6-Succinyl Adenosine	C14 H17 N5 O8	383.108	5.014	384.115	No results	No results	Full match	Nucleosides, nucleotides, and analogues	Purine nucleosides	Not available	Purine nucleosides	3.6184e+08	3.71191e+08	4.10042e+08	4.20888e+08	4.18058e+08	4.08147e+08	1.13132e+06	1.4589e+06	1.20254e+06	1.38276e+06	1.1494e+06	1.30608e+06	313.218	8.29102	9.64717e-15	1	2.13773
Com_3336_pos	N-Acetylglucosamine	C8 H15 N O6	221.09	1.336	260.053	No results	No results	Full match	Organic oxygen compounds	Organooxygen compounds	Carbohydrates and carbohydrate conjugates	Acylaminosugars	7.90252e+07	6.9931e+07	8.18497e+07	6.29814e+07	9.47227e+07	5.66601e+07	329342	477289	348207	388077	307134	351951	202.166	7.6594	2.84771e-13	1	2.65904
Com_569_pos	Neopterin	C9 H11 N5 O4	253.081	2.415	254.088	Full match	No results	No results	Organoheterocyclic compounds	Pteridines and derivatives	Pterins and derivatives	Biopterins and derivatives	6.03093e+08	4.28111e+08	5.08644e+08	4.97656e+08	6.39724e+08	4.51213e+08	3.63182e+06	3.64695e+06	3.81504e+06	3.98187e+06	3.28297e+06	3.75141e+06	141.494	7.1446	8.06831e-11	1	2.223
Com_1533_pos	4-acetyl-4-(ethoxycarbonyl)heptanedioic acid	C12 H18 O7	274.103	3.854	275.11	Invalid mass	No results	No results					5.01406e+07	3.2562e+07	4.22527e+07	2.53188e+07	4.54534e+07	2.89078e+07	188009	243627	305921	209704	184540	680244	123.968	6.95382	3.46035e-08	1	1.91644
Com_527_pos	Vindoline	C25 H32 N2 O6	456.233	5.878	457.241	Invalid mass	No results	No results	Alkaloids and derivatives	Plumeran-type alkaloids	Not available	Plumeran-type alkaloids	1.29675e+08	9.5255e+07	1.93372e+08	1.35513e+08	1.2113e+08	1.11688e+08	1.25932e+06	1.26731e+06	1.23792e+06	1.27396e+06	1.18245e+06	1.28177e+06	104.846	6.71213	5.27569e-08	1	1.74226
Com_941_neg	Glycitein	C16 H12 O5	284.069	6.706	283.061	Full match	Full match	Full match	Phenylpropanoids and polyketides	Isoflavonoids	Isoflav-2-enes	Isoflavones	8.64182e+07	2.27264e+07	2.75903e+07	9.29778e+07	3.02968e+07	3.68867e+07	491897	729132	602624	421121	662020	484287	87.5521	6.45207	2.30779e-06	1	1.70994
Com_1612_pos	2'-O-Methyladenosine	C11 H15 N5 O4	281.113	4.751	282.12	Full match	Full match	Full match	Nucleosides, nucleotides, and analogues	Purine nucleosides	Not available	Purine nucleosides	5.73223e+07	2.732e+07	5.76891e+07	4.24407e+07	4.15269e+07	2.93488e+07	519872	652897	589966	501112	494056	533393	77.6739	6.27936	5.15363e-08	1	1.58988
Com_5789_pos	6,7-dihydro-5H-dibenzo[d,f][1,3]diazepin-6-one	C13 H10 N2 O	210.079	6.664	211.087	Full match	No results	No results					4.93877e+07	3.07363e+07	4.88765e+07	2.41549e+07	3.16044e+07	1.92106e+07	432822	459610	456623	354878	474958	456735	77.3898	6.27407	2.6263e-07	1	2.59491
Com_1038_neg	3-O-p-coumaroyl shikimic acid O-hexoside	C22 H26 O12	482.143	5.593	481.136	No results	No results	Full match					3.79903e+07	3.07417e+07	4.01177e+07	4.7342e+07	3.52114e+07	3.9669e+07	594354	578031	555949	638853	471579	629283	66.6289	6.05808	3.39868e-13	1	2.02603
Com_1315_neg	3-methyl-5-oxo-5-(4-toluidino)pentanoic acid	C13 H17 N O3	235.121	6.078	234.114	Full match	No results	No results					448242	438709	475511	482178	466715	456273	4.98594e+07	5.35485e+07	7.9147e+07	8.41765e+07	4.16304e+07	8.48129e+07	0.00703918	-7.15038	1.55278e-07	1	1.72325
Com_8369_pos	Lithocholic acid	C24 H40 O3	393.324	9.809	416.314	Invalid mass	No results	No results	Lipids and lipid-like molecules	Steroids and steroid derivatives	Bile acids, alcohols and derivatives	Monohydroxy bile acids, alcohols and derivatives	166271	130167	171963	269460	140934	242817	2.90387e+07	8.01756e+06	7.18848e+06	3.22233e+07	1.70027e+07	2.27599e+07	0.00964987	-6.69527	1.11436e-06	1	2.52274
Com_548_pos	2-(4-chlorophenoxy)-N-(2-oxo-3-azepanyl)nicotinamide	C18 H18 Cl N3 O3	359.101	5.589	360.108	Invalid mass	No results	No results					3.80448e+06	3.81401e+06	4.91587e+06	1.13503e+07	2.72694e+06	1.12035e+07	4.96867e+08	6.18652e+08	4.72505e+08	7.60265e+08	4.85974e+08	5.52072e+08	0.011167	-6.48462	2.10219e-06	1	2.00549
Com_16979_pos	R-1 Methanandamide phosphate	C23 H40 N O5 P	463.24	9.367	464.247	Invalid mass	No results	No results	Organic acids and derivatives	Organic phosphoric acids and derivatives	Phosphate esters	Phosphoethanolamines	96751.3	85310.5	89543.1	87635.9	66418.3	114640	6.94974e+06	5.12605e+06	2.54953e+06	8.14453e+06	5.63481e+06	7.25774e+06	0.0151504	-6.0445	1.45684e-07	1	2.78614
Com_5782_pos	Lactose	C12 H22 O11	342.116	2.266	343.124	No results	No results	Full match	Organic oxygen compounds	Organooxygen compounds	Carbohydrates and carbohydrate conjugates	O-glycosyl compounds	726265	659750	1.03516e+06	1.02532e+06	707987	719918	4.24289e+07	4.06369e+07	4.378e+07	5.45933e+07	4.09693e+07	4.41934e+07	0.0182835	-5.77332	1.76881e-10	1	2.3911
Com_3964_neg	Valepotriate	C22 H30 O8	422.195	5.473	421.187	No results	No results	Full match	Lipids and lipid-like molecules	Prenol lipids	Monoterpenoids	Iridoids and derivatives	511179	518327	582897	680640	587461	554740	2.85464e+07	2.53181e+07	2.86372e+07	3.02411e+07	3.57376e+07	2.84689e+07	0.0194137	-5.68678	3.00156e-14	1	2.51727
Com_7088_neg	FAHFA 18:2/3:0	C21 H36 O4	352.262	9.967	351.254	No results	Full match	Full match					43844.4	45893.1	43890	51726.3	42674	51785.8	4.38313e+06	3.24341e+06	2.66898e+06	3.66587e+06	52632.6	55725.1	0.0198876	-5.65199	0.0208028	1	1.30301
Com_2591_neg	4-[(3,4-dimethoxyphenethyl)amino]-4-oxobutanoic acid	C14 H19 N O5	281.127	5.563	280.119	Full match	No results	No results					536180	583862	1.23667e+06	1.57474e+06	676803	980593	4.11644e+07	5.74386e+07	2.3668e+07	6.92029e+07	2.17058e+07	4.77903e+07	0.0214157	-5.54519	4.73492e-08	1	2.3521
Com_5828_pos	2-(tert-butyl)-6,7-dimethoxy-4H-3,1-benzoxazin-4-one	C14 H17 N O4	263.116	6.326	264.123	Full match	No results	No results					661067	652474	584517	526186	650276	534328	4.73067e+07	1.4233e+07	3.47191e+07	1.90344e+07	3.35962e+07	1.40883e+07	0.0221432	-5.49699	6.00657e-06	1	2.77261
Com_16391_pos	WKK	C23 H36 N6 O4	442.27	9.311	443.277	Invalid mass	No results	No results					133922	131871	161014	436904	91254.4	174917	7.98049e+06	5.69326e+06	4.94311e+06	8.75761e+06	7.90658e+06	5.46007e+06	0.0277332	-5.17224	1.09567e-06	1	2.72555
